1  
2  
3  
4  
5  
6  
7  
8  
9  
10  
11  
12  
13  
14  
15  
16  
17  
18  
19  
20  
21  
22  
23  
24  
25  
26  
27  
28  
29  
30  
31  
32  
33

## **A Chemically-triggered Transition from Conflict to Cooperation in Burying Beetles**

Bo-Fei Chen<sup>†1,2,3</sup>, Mark Liu<sup>†3</sup>, Dustin R. Rubenstein<sup>4</sup>, Syuan-Jyun Sun<sup>3</sup>, Jian-Nan Liu<sup>3</sup>, Yu-Heng Lin<sup>3</sup> and Sheng-Feng Shen<sup>1,2,3\*</sup>

<sup>1</sup>Department of Life Science, National Taiwan Normal University, Taipei, Taiwan 11677

<sup>2</sup>Biodiversity Program, Taiwan International Graduate Program, Academia Sinica and National Taiwan Normal University, Taipei, Taiwan 11529

<sup>3</sup>Biodiversity Research Center, Academia Sinica, Taipei, 11529, Taiwan

<sup>4</sup>Department of Ecology, Evolution and Environmental Biology, Columbia University, 1200 Amsterdam Avenue, New York, NY 10027 USA

<sup>†</sup>These authors contributed equally to this work

**\*Corresponding author:**

Sheng-Feng Shen

Address: Biodiversity Research Center, Academia Sinica, 11529, Taiwan

Email: [shensf@sinica.edu.tw](mailto:shensf@sinica.edu.tw)

34 **Although interspecific competition has long been recognized as a major**  
35 **driver of trait divergence and adaptive evolution<sup>1-3</sup>, relatively little effort**  
36 **has focused on how it influences the evolution of intraspecific cooperation<sup>4-</sup>**  
37 **<sup>6</sup>. Here we identify the mechanism by which the perceived pressure of**  
38 **interspecific competition influences the transition from intraspecific**  
39 **conflict to cooperation in a facultative cooperatively breeding species, the**  
40 **Asian burying beetle *Nicrophorus nepalensis*. In their natural environment**  
41 **in central Taiwan, *N. nepalensis* are typically aggressive to conspecifics and**  
42 **only cooperate with others of their own species at critical carcass resources**  
43 **in the presence of blowflies, their primary competitors<sup>7</sup>. We demonstrate**  
44 **that beetles form larger groups and are more cooperative in carcass**  
45 **preparation in warmer environments where the pressure of interspecific**  
46 **competition with blowflies is highest<sup>8</sup>. To test the hypothesis that the**  
47 **presence of blowflies promotes beetle cooperation and to identify the**  
48 **mechanism by which this occurs, we manipulated blowfly larvae on**  
49 **carcasses in the lab. We not only found that beetles are more cooperative at**  
50 **carcasses when blowfly maggots have begun to digest the tissue, but that**  
51 **this social cooperation appears to be triggered by a single chemical cue—**  
52 **dimethyl disulfide (DMDS)—emitted from carcasses consumed by blowflies**  
53 **but not from control carcasses lacking blowflies. Our results provide**  
54 **experimental evidence that interspecific competition promotes the**  
55 **transition from intraspecific conflict to cooperation in *N. nepalensis* via a**  
56 **surprisingly simple social chemical cue that is a reliable indicator of**  
57 **interspecific competition. This finding helps bridge the gap between the**  
58 **proximate and ultimate factors regulating the transition between**  
59 **cooperation and conflict and moves toward a more comprehensive**  
60 **understanding of the evolution of mechanisms governing intraspecific**  
61 **variation in social behaviour.**

62

63 Burying beetles (*Nicrophorus spp.*) use small vertebrate carcasses as their sole  
64 resource for reproduction and often face intense intra- and interspecific  
65 competition for access to these precious but limiting resources<sup>9-11</sup>. Previous work  
66 has suggested that the key benefit of cooperation in the Asian burying beetle *N.*

67 *nepalensis* is that cooperative carcass preparation—including carcass cleaning,  
68 shaping, and burial, as well as the elimination of competing species<sup>9-12</sup>—enables  
69 beetles to outcompete their primary competitor, blowflies (family Calliphoridae),  
70 particularly in warmer environments where blowflies are most abundant. By  
71 experimentally manipulating burying beetle group size along an elevational  
72 gradient, we showed that in cooler environments where the pressure of  
73 interspecific competition is low, beetles in large groups are more aggressive  
74 toward same-sex conspecifics and often engage in intense and even lethal fights  
75 that result in a single individual monopolizing the carcass and having a higher  
76 probability of breeding successfully than those in large groups<sup>8</sup>. In contrast, in  
77 warmer environments where blowflies are more common, burying beetles  
78 cooperate with conspecifics to more quickly bury carcasses and escape blowfly  
79 competition<sup>7</sup>, ultimately gaining greater reproductive success<sup>8</sup>. Although the  
80 presence of blowflies at carcasses appears to facilitate a shift from competitive to  
81 cooperative behaviour in *N. nepalensis*, it remains unclear what drives this  
82 transition in beetle social behaviour and how individuals know to reduce conflict  
83 and tolerate conspecifics.

84

85 To determine how ecology influences inter- and intraspecific social interactions  
86 in natural burying beetle populations, we first quantified beetle social behaviour  
87 and dynamics by video recording their breeding behaviours at 25 sites along two  
88 elevational gradients in eastern and western Taiwan, each spanning more than  
89 1000 m in elevation. We calculated the time that beetles spend on cooperative

90 carcass preparation (hereafter cooperative investment) both in terms of total  
91 investment (i.e. the cumulative time of the social group) and on a per capita basis  
92 for large (groups larger than the median size) and small groups (groups smaller  
93 than the median size), as well as in cool (<14.5°C) and warm environments  
94 (>14.5°C). We found that group size peaked at moderate temperatures ( $\chi^2_1 =$   
95 5.52,  $P = 0.019$ ,  $n = 245$ ; Fig. 1a) and that per capita cooperative investment along  
96 the temperature gradient varied with group size (group size  $\times$  temperature  
97 interaction,  $\chi^2_1 = 11.20$ ,  $P = 0.001$ ,  $n = 89$ ). Specifically, per capita cooperative  
98 investment increased with daily minimum temperature in large groups ( $\chi^2_1 =$   
99 5.39,  $P = 0.02$ ,  $n = 33$ ), but not in small groups ( $\chi^2_1 = 0.05$ ,  $P = 0.83$ ,  $n = 56$ ; Fig  
100 1b). Similarly, total cooperative investment increased with daily minimum  
101 temperature in large groups ( $\chi^2_1 = 4.88$ ,  $P = 0.03$ ,  $n = 33$ ), but not in small groups  
102 ( $\chi^2_1 = 0.24$ ,  $P = 0.60$ ,  $n = 56$ ; Fig. 1c). In contrast, per capita social conflict along  
103 the temperature gradient, measured as the number of intraspecific conflict  
104 events for each individual, varied with group size (mean group size  $\times$   
105 temperature interaction,  $\chi^2_1 = 6.64$ ,  $P < 0.01$ ,  $n = 82$ , Fig. 2b), such that conflict  
106 increased with group size in cool environments ( $\chi^2_1 = 11.24$ ,  $P < 0.001$ ,  $n = 40$ ;  
107 Fig. 1d), but not in warm environments ( $\chi^2_1 = 1.59$ ,  $P = 0.2$ ,  $n = 42$ ; Fig. 1d).

108

109 To confirm that these patterns of social conflict and cooperation were the result  
110 of changes in social behaviour and not simply changes in activity associated with  
111 differences in ambient temperature, we further separated cooperative  
112 investment into (1) time spent simply walking on the carcass and (2) more

113 complex carcass-preparation behaviours, which are presumably more costly—  
114 including maggot and rotten tissue removal, as well as carcass dragging,  
115 depilation, and burial. We found that time spent on more complex carcass  
116 preparation behaviours increased with increasing daily minimum temperature in  
117 large groups ( $\chi^2_1 = 5.39, P = 0.02, n = 33$ ; Fig. 2a), but not in small groups ( $\chi^2_1 =$   
118  $0.17, P = 0.68, n = 56$ ; Fig. 2a). However, there was no significant relationship  
119 between walking time and daily minimum temperature in large ( $\chi^2_1 = 0.24, P =$   
120  $0.60, n = 33$ ; Fig. 2b) or small groups ( $\chi^2_1 = 0.79, P = 0.37, n = 56$ ; Fig. 2b),  
121 suggesting that the increase in total cooperative investment in warmer  
122 environments was not simply the result of increased activity at warmer  
123 temperatures.

124

125 Our field results demonstrate that *N. nepalensis* exhibits remarkably flexible  
126 social behaviours along elevational and thermal gradients: beetles are normally  
127 asocial and aggressive towards conspecifics in cooler environments but become  
128 social and cooperate with conspecifics in warmer environments where the  
129 competition for critical resources with other species is intense<sup>7</sup>. However, to  
130 demonstrate experimentally that blowfly competition for carcasses drives the  
131 transition from intraspecific competition to intraspecific cooperation, we  
132 performed a series of laboratory experiments to directly manipulate the  
133 presence or absence of blowflies at carcasses.

134

135 Our first experiment introduced blowfly competition to burying beetles by  
136 exposing carcasses to adult blowflies in an incubator at 26°C for two days,  
137 conditions that match those in the field and are optimal for blowflies to lay eggs  
138 and for their maggots to partially consume the carcass. We then allowed six  
139 beetles (three males and three females) to breed on the carcass. We found that  
140 more beetles cooperated ( $t = 5.26, P < 0.001$ ; Fig. 3a), and that each individual  
141 beetle spent significantly more time cooperating, in the blowfly treatment than in  
142 the control treatment containing carcasses but no blowflies ( $t = 3.27, P = 0.002$ ;  
143 Fig. 3b). As a consequence, the total cooperative investment was higher in the  
144 blowfly treatment than in the control treatment ( $t = 5.37, P < 0.001$ ; Fig. 3c).  
145 Although there was no difference in per capita social conflict between the blowfly  
146 and control treatments ( $t = -0.33, P = 0.75$ ; Fig. 3d), after controlling for total  
147 investment time by dividing per capita social conflict by the total cooperative  
148 investment, the adjusted per capita number of social conflicts per unit time was  
149 significantly lower in the blowfly treatment than in the control treatment ( $t = -$   
150  $2.58, P = 0.013$ ; Fig. S1). Thus, social conflict in burying beetles was lower and  
151 cooperation higher when blowflies were present on carcasses.

152

153 What is the mechanism driving the transition from intraspecific competition to  
154 intraspecific cooperation? Since blowfly species are diurnal but *N. nepalensis* is  
155 nocturnal, it is unlikely that the physical presence of blowflies influences *N.*  
156 *nepalensis* behaviour. Previous studies have demonstrated that sulfur-containing  
157 volatile organic compounds (S-VOCs) emitted from decomposing carcasses

158 attract burying beetles to this key resource<sup>13,14</sup>. Because GC-MS analysis showed  
159 that dimethyl disulfide (DMDS) appeared earlier and was more abundant in the  
160 blowfly treatment than in the control (Fig. 4a), we hypothesized that DMDS is the  
161 key infochemical<sup>15</sup>—indicating not only the presence of a decaying carcass but  
162 also the degree of interspecific competition at that carcass—that mediates the  
163 transition between cooperative and competitive strategies in *N. nepalensis*.

164

165 To experimentally test this hypothesis, we injected DMDS into the body cavity of  
166 mouse carcasses. We found that more individuals cooperated ( $t = -3.76$ ,  $P <$   
167  $0.001$ ; Fig. 4b), and that each individual spent more time cooperating, in DMDS  
168 treated carcasses relative to controls ( $t = -2.55$ ,  $P = 0.014$ ; Fig. 4c). Thus, there  
169 was a higher total cooperative investment in the DMDS treatment than in the  
170 control ( $t = -3.8$ ,  $P < 0.001$ ; Fig. 4d). These results were similar to those observed  
171 in the blowfly treatment from the initial experiment. The only difference between  
172 the DMDS and blowfly treatments was that there was marginally more social  
173 conflict in the DMDS treatment than in the hexane control ( $t = -1.97$ ,  $P = 0.054$ ;  
174 Fig. 4e), whereas this trend—while in the same direction—was not significant in  
175 the blowfly treatment ( $t = -0.33$ ,  $P = 0.75$ ), presumably because there were no  
176 real competitors that beetles need to remove in the DMDS treatment.

177

178 Our study shows that burying beetles transition from competitive to more  
179 cooperative interactions as the pressure of interspecific competition increases.

180 Accumulating empirical evidence from other animals suggests that social conflict  
181 in cooperative societies is often lower in adverse environments with strong  
182 interspecific competition<sup>5</sup>. This pattern of reduced social conflict under strong  
183 interspecific competition has largely been explained by the fact that the cost of  
184 engaging in competitive interactions increases under adverse conditions<sup>16</sup>. Yet,  
185 there is little empirical evidence demonstrating that social animals increase their  
186 investment in cooperation under the threat of interspecific competition. One  
187 exception comes from cooperatively breeding superb fairy-wrens (*Malurus*  
188 *cyaneus*) who cooperate more in nest defence when exposed to a greater threat  
189 of interspecific brood parasitism<sup>17</sup>. However, it remains unclear how intraspecific  
190 conflict in fairy-wrens is influenced by the threat of interspecific competition.  
191 Our study helps fill this knowledge gap by showing that cooperative carcass  
192 preparation to reduce blowfly competition in warmer environments is critical for  
193 predicting both the cooperative and competitive interactions among individuals  
194 of the same species.

195

196 Furthermore, we show that the conditional cooperative and competitive  
197 strategies<sup>18,19</sup> used by *N. nepalensis* to maximize their utility of carcasses are  
198 mediated by a surprisingly simple chemical mechanism. DMDS is produced  
199 during the decomposition process and acts as an indicator of the level of  
200 competition from blowflies. Although interspecific competition has long been  
201 recognized as a major ecological force that drives adaptive evolution<sup>1-3</sup>, relatively  
202 little effort has focused on how it influences intraspecific cooperation<sup>4-6</sup>. Our



203 discovery of a novel social chemical cue provides unambiguous evidence that  
204 interspecific competition has shaped social evolution in *N. nepalensis*. DMS acts  
205 as a kairomone because it is produced by heterospecifics (i.e. blowfly digestion),  
206 but benefits the receiver<sup>15</sup>, and not as a pheromone produced by conspecifics<sup>20,21</sup>.  
207 Pheromones are often used for kin discrimination, and studying the olfactory  
208 sensory system and its genes have greatly advanced our understandings of the  
209 role that chemically-driven kin recognition has played in social evolution,  
210 especially in ants<sup>22,23</sup>. Here we demonstrate that interspecific chemical  
211 communication is also important to insect social evolution. Ultimately, by  
212 showing that chemically-mediated interspecific competition is a key driver of  
213 intraspecific cooperation and of social evolution more generally, our work  
214 demonstrates the value of integrating ultimate and proximate levels to study the  
215 evolution of cooperation<sup>24</sup>.

216

## 217 **Methods**

218 **Field Study.** The field study was conducted in Taiwan from 2012 to 2015 along  
219 elevational gradients composed primarily of uncultivated forest in Nantou county  
220 (spanning 1688 m to 2650 m above sea level) and Hualien county (spanning  
221 1193 m to 2720 m above sea level). A variety of social behaviours, including per  
222 capita social conflict and investment in cooperative carcass preparation (i.e.  
223 cooperative investment), were scored on the first night of video observation  
224 (from 19:00 to 05:00) using the Observer<sup>®</sup> XT 14 (Noldus). To quantify total  
225 cooperative investment, we estimated the cumulative time that each beetle spent  
226 depilating rat hair, cleaning rat carcasses by removing maggots, or dragging

227 carcasses during carcass burial and preparation. We measured per capita  
228 cooperative investment as the total cooperative investment divided by the mean  
229 group size, defined as the maximum number of beetles that stayed on or under  
230 carcasses averaged over three time periods (22:30 to 22:40; 01:30 to 01:40 and  
231 04:30 to 04:40) during each video observation. Investment in cooperation was  
232 quantified as the duration of cumulative time sampled for a 10 mins observation  
233 period in each hour (i.e. 100 mins for each breeding experiment). In total, there  
234 were 89 breeding experiments (resulting in 8900 mins of video recordings) from  
235 which we were able to quantify total cooperative investment. Aggressive  
236 interactions were defined as social conflict if a beetle attacked, wrestled, chased,  
237 or escaped from another same-sexed individual (see below for definitions of each  
238 behaviour). We measured total social conflict as the total number of aggressive  
239 interactions over the 240 mins observation period. We measured per capita  
240 social conflict as the total number of aggressive interactions divided by the mean  
241 group size for each observation period. Conflict was quantified as the total  
242 number of aggressive interactions sampled for two 120 mins observation periods  
243 (from 19:30 to 21:30 and from 23:30 to 1:30). In total, there were 82 breeding  
244 experiments (resulting in 19,680 mins of video recordings) from which we were  
245 able to quantify conflict behaviour. We determined the mean group size on the  
246 first night of each beetle's arrival in 245 breeding experiments (resulting in 7350  
247 mins of video recordings).

248

249 **Collection and maintenance.** Lab experiments were carried out using *N.*  
250 *nepalensis* individuals from laboratory-reared strains that originated from  
251 Meifeng, Nantou County, Taiwan (24°5' N, 121°10'). Burying beetles were  
252 collected using hanging pitfall traps baited with 100 g rotten chicken breasts.  
253 Collected beetles were randomly paired and supplied with frozen and re-thawed  
254 75 ± 5 g dead rats (*Rattus norvegicus*) in 23 × 15.5 × 16 cm plastic boxes filled  
255 with 10 cm moist peat for reproduction. The emerged beetles were housed  
256 individually in 7.3 × 7.3 × 3.5 cm plastic boxes filled with 2 cm moist peat and fed  
257 with dead superworms (*Zophobas morio*) once a week. All individuals were kept  
258 in environmental chambers at 13.2 ~ 19.7 °C (to resemble the natural daily  
259 temperature fluctuation in their natural habitat) on a 14 L:10 D photoperiod.  
260 Experimental beetles were between 40 and 80 days of age, which is their optimal  
261 age for reproduction (individuals can live for over three months in the  
262 laboratory).

263

264 **Experimental design and procedure.** For each experimental replicate, three  
265 unrelated males and three unrelated females were randomly chosen from  
266 different families to avoid relatedness affecting their behaviours. Each individual  
267 was weighed to the nearest 0.1 mg and marked with a Uni POSCA paint marker  
268 on the elytra and coated with Scorch® Super GlueGel for individual identification  
269 in videos. The marking and weighing of beetles was done 2 hrs prior to beginning  
270 an experiment to ensure that all beetles would return to normal activity levels.  
271 All six marked beetles were placed into the experimental boxes in random order

272 at the beginning of each experiment. Experimental boxes consisted of a smaller  
273 plastic container (23 × 15.5 × 13.5 cm filled with 13.5 cm moist peat) located  
274 inside a larger plastic container (45 × 34.5 × 25 cm filled with 13.5 cm moist  
275 peat). A 4 cm high iron net with 2 cm<sup>2</sup> mesh was placed around the small  
276 container to prevent beetles moving carcasses outside the field of view of the  
277 digital cameras, but beetles could still move freely between the inner and outer  
278 areas. A digital camera was fitted on the top of a 25 × 20 × 55 cm acrylic box,  
279 which was fixed on the cap of the large container. To equalize the temperature of  
280 the experimental apparatus, boxes were filled with moist peat and put into the  
281 environmental chambers one day before the experiments began.

282 The blowfly treatment was conducted by exposing a 75 ± 5 g rat thawed  
283 carcass to blowflies, oriental latrine flies (*Chrysomya megacephala*), in 32 × 32 ×  
284 32 fly cages for 50 hrs before the start of each experiment. Fly cages contained  
285 oriental latrine flies that had emerged from 10 g pupa and been kept in  
286 environmental chambers at 26°C on a 14 L:10 D photoperiod. Except for maggot-  
287 digested carcasses, all other carcasses in the same weight range were thawed at  
288 4°C for 24 hrs before experiments began. Carcasses used in all treatments were  
289 moved into the environmental chambers 8 hrs prior to the start of experiments  
290 to equalize their temperatures. The hexane control and DMDS treatment used  
291 thawed-only carcasses injected with 2 ml hexane or 0.01 M DMDS solution,  
292 respectively, into abdominal cavities through the anus using 3 ml Terumo®  
293 Syringes and needles 1 hr prior to the start of the experiment. The thawed-only  
294 carcasses served as controls. The carcasses in controls and all treatments were

295 moved into the experimental boxes and put on the surface of peat in smaller  
296 containers 1 hr before experiments began. Behavioural videos were recorded  
297 either from 7 PM until the day and time at which a carcass was completely buried  
298 into peat or for 72 hrs if the beetles did not completely bury the carcass (under  
299 natural conditions, a carcass would be completely consumed by blowflies if  
300 beetles did not completely bury it within 72 hrs). In total, 1020 hrs of videos  
301 were analyzed from 23 blowfly control replicates, 23 blowfly treatment  
302 replicates, 32 hexane control replicates, and 24 DMDS replicates. Social conflict  
303 and cooperative investment behaviours were recorded in the first 10 hrs (7 PM  
304 to 5 AM) of each experimental treatment using The Observer<sup>®</sup> XT 14 (Noldus).

305

306 **Gas chromatography-mass spectrometry (GC-MS) analysis.** The composition  
307 of volatile organic compounds (VOCs) emitted by carcasses was determined from  
308 two control and two blowfly treated carcasses prepared using the same  
309 procedure described previously. The prepared carcasses were put on the peat  
310 surface in glass vacuum desiccators (15 cm diameter × 22 cm tall) filled with 5  
311 cm of moist peat. The stopcock and ground-glass rim of the desiccator lid were  
312 greased with a thin layer of petroleum jelly to prevent the leakage of emitted  
313 VOCs, as well as contamination from the atmosphere. The VOCs were sampled  
314 using solid-phase micro-extraction (SPME)<sup>25</sup>. The SPME holder with CAR/PDMS  
315 fiber (Supelco, previously desorbed for 5 mins in GC injection port heated to  
316 200°C) was inserted through the hole of the stopcock into the atmosphere  
317 surrounding the rat carcass. Immediately after exposing the fiber for 15 mins, the

318 sample was GC-MS-analyzed using a 6890N Network Gas Chromatograph  
319 (Agilent Technologies) equipped with a HP-5ms column (Agilent J&W) and a  
320 5975 Mass Selective Detector (Agilent Technologies). The GC oven was operated  
321 at an initial temperature 40°C for 1 min and then ramped up at a rate 10°C per  
322 min to 250°C (with a 10 mins hold). The temperatures of the GC inlet and  
323 detector were set to 200°C and 260°C, respectively. The SPME samples were GC  
324 analysed split-less. Helium (1 ml per min) was used as a carrier gas. Since the GC-  
325 MS results showed DMDS was the major VOC emitted by the blowfly-treated  
326 carcasses, DMDS was injected into carcasses in the further experiments. Two  
327 DMDS-injected carcasses (also prepared using the same procedure described  
328 previously) were used in GC-MS analyses (following the procedure described  
329 above) to determine the composition of the VOCs they emitted.

330

331 **Statistical analyses.** Multivariate analyses were performed using generalized  
332 linear models (GLMs) to determine statistical significance for differences  
333 between controls and blowfly treatments or hexane controls and DMDS  
334 treatments in mean group size, total and per capita cooperative investment, and  
335 total and per capita social conflict. All statistical analyses were performed in R  
336 using the packages stats, lme4, car, multcomp (<http://cran.r-project.org/>), and  
337 glmmADMB (<http://glmmadmb.r-forge.r-project.org/>).

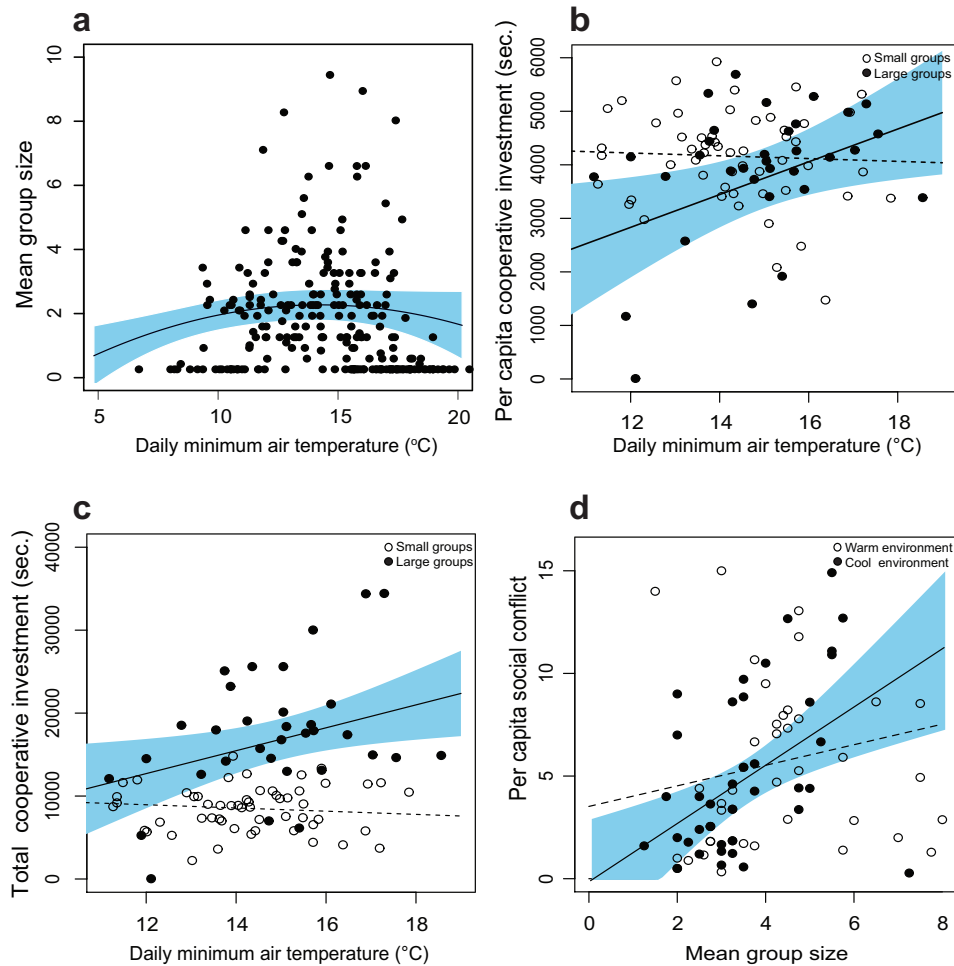

338

339 **Figure 1 | Changes in *N. nepalensis* group size and social behaviours during**

340 **carcass preparation along a temperature gradient.** The relationship between

341 daily minimum air temperature and **(a)** mean group size, **(b)** per capita

342 cooperative investment, **(c)** total cooperative investment in large (closed circles)

343 and small groups (open circles). Group size peaked at moderate temperatures,

344 whereas per capita and total cooperative investment increased with daily

345 minimum temperature in large but not small groups. Solid lines denote predicted

346 relationships from GLMs, whereas dashed lines denote non-significant

347 relationships. **(d)** Per capita social conflict increased with group size in cool

348 environments (closed circles), but not in warm environments (open circles).

349 Lines represent least-squared means (solid lines denote significant relationships

350 and dotted lines non-significant relationships), and blue shaded areas represent

351 95% confidence intervals expected from GLMMs.

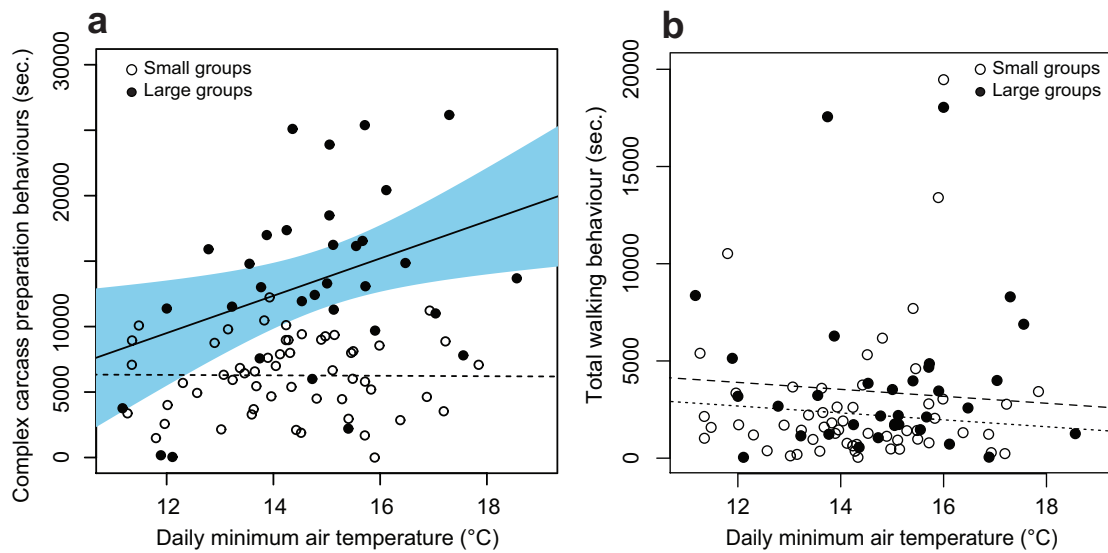

352

353 **Figure 2 | Complex carcass preparation and simple walking behaviours**

354 **during cooperative carcass preparation along the temperature gradient.**

355 The time that beetles spent on **(a)** complex carcass preparation behaviours and  
356 **(b)** walking on the carcass in relation to daily minimum air temperature in large  
357 and small groups. Compared to small groups (open circles), large groups (closed  
358 circles) spent more time on complex carcass preparation but not on walking as  
359 daily minimum air temperature increased, suggesting that the increase in total  
360 cooperative investment in warmer environments was not simply the result of  
361 increased activity at warmer temperatures. Lines represent least-squared means  
362 (solid lines denote significant relationships and dotted lines non-significant  
363 relationships), and the blue shaded area represent 95% confidence intervals  
364 expected from GLMMs.



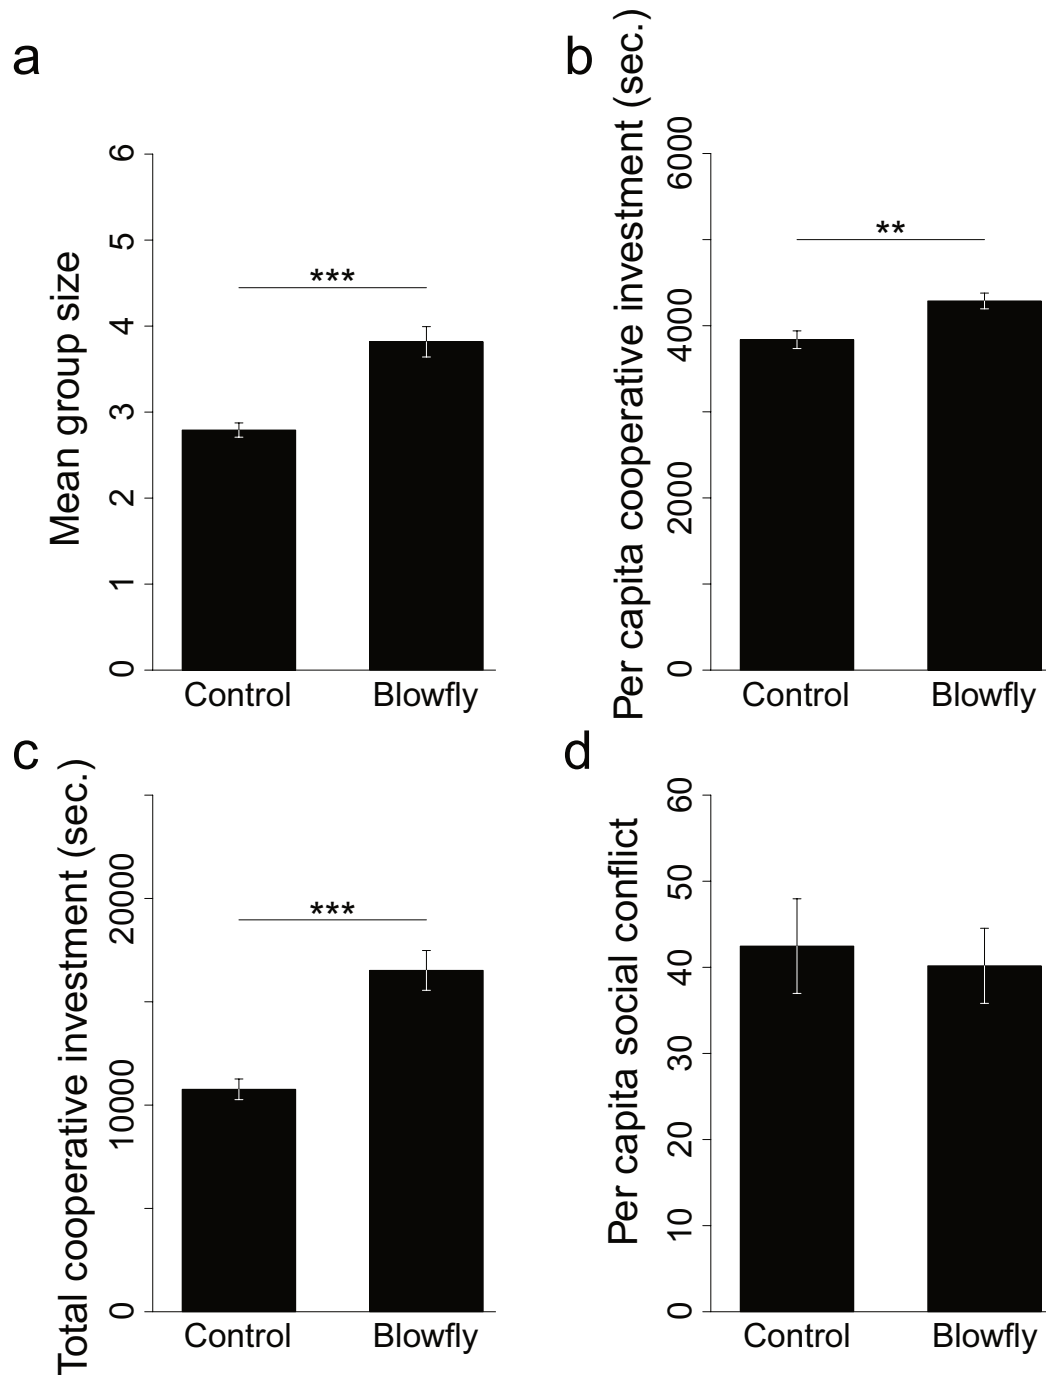

365

366

**Figure 3 | *N. nepalensis* social behaviours in control and blowfly treatments.**

367

**(a)** Mean group size, **(b)** per capita cooperative investment, **(c)** total cooperative

368

investment, and **(d)** per capita social conflict of burying beetles on carcasses.

369

Beetles formed larger groups and had greater per capital and total cooperative

370

investment in carcass preparation in the presence of blowflies than in control

371

treatments where blowflies were absent. \*\*  $P \leq 0.01$ ; \*\*\*  $P \leq 0.001$ .

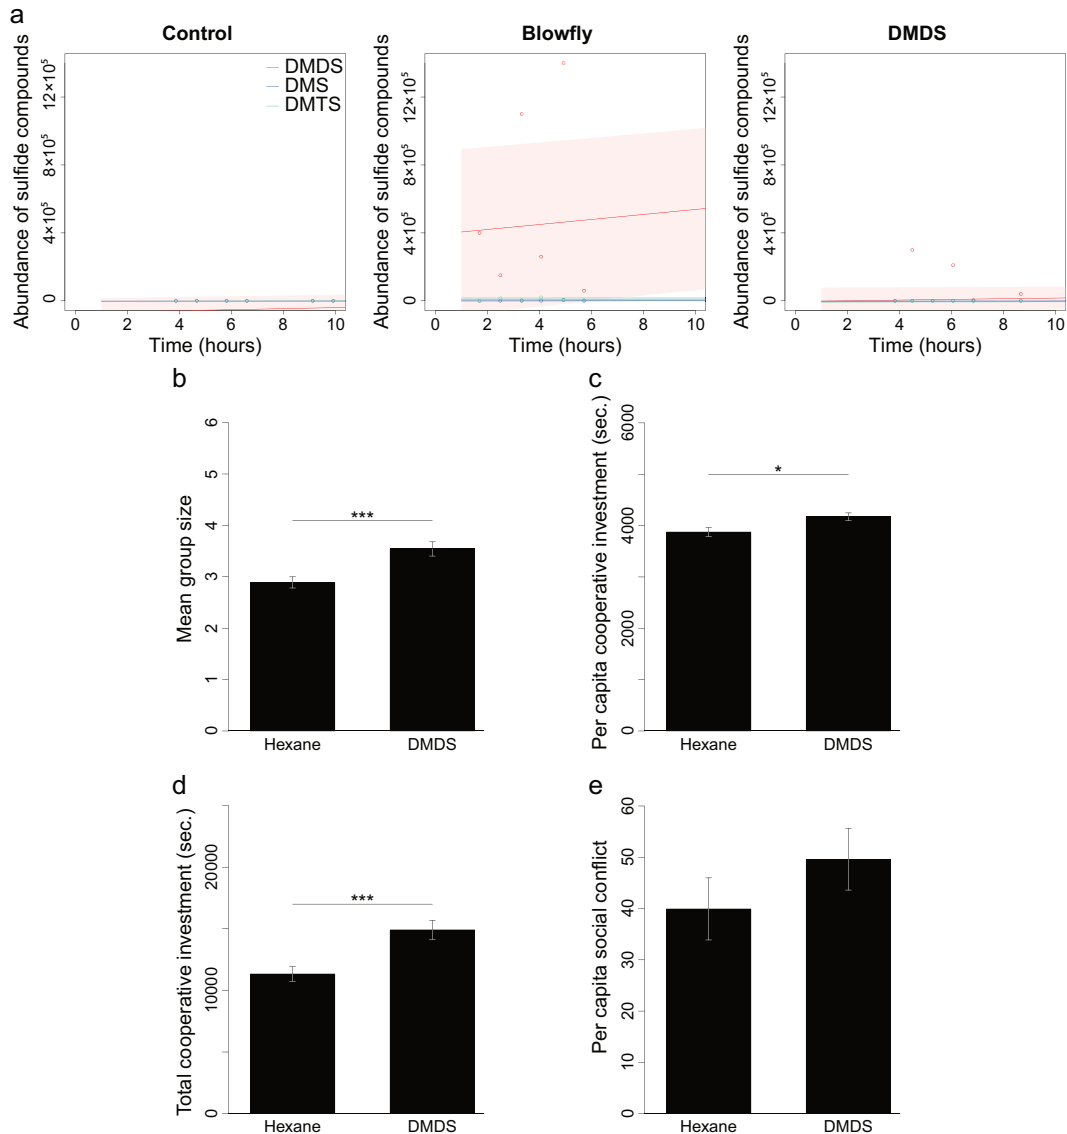

372

373 **Figure 4 | Results of gas chromatography-mass spectrometry (GC-MS)**

374 **analyses and *N. nepalensis* social behaviours in hexane and DMDS**

375 **treatments. (a)** GC-MS analyses showed an abundance of sulfide compounds,

376 including dimethyl sulfide (DMS), dimethyl disulfide (DMDS) and dimethyl

377 trisulfide (DMTS) in control, blowfly, and DMDS treatments during the first 10

378 hrs. DMDS was the major sulfide compound emitted by maggot-digested

379 carcasses. Shaded areas represent 95% confidence intervals expected from

380 GLMMs. **(b)** Mean group sizes, **(c)** per capita cooperative investment, **(d)** total

381 cooperative investment, and **(e)** per capita social conflict of burying beetles on

382 carcasses in DMDS and hexane control treatments. Beetles formed larger groups

383 and had greater per capital and total cooperative investment on carcasses in the

384 DMDS treatment compared to the hexane control treatment. \*  $P \leq 0.05$ ; \*\*\*  $P \leq$

385 0.001.

386 **Author contributions:**

387 S.-F.S. conceived the idea for the study. B.-F.C., M.L., D.R.R. and S.-F.S. design the  
388 experiments. B.-F.C., M.L., S.-J.S. performed field experiment. B.-F.C. and J.-N.L.  
389 performed lab behavior experiments. B.-F.C. and Y.-H.L. did the GC-MS analysis.  
390 B.-F.C., M.L., D.R.R. and S.-F.S. analyzed the data and wrote the paper.

391

392 **Acknowledgements**

393 S.-F.S. was supported by Career Development Award and Investigator Award,  
394 Academia Sinica and Ministry of Science and Technology of Taiwan (100-2621-B-  
395 001-001, 103-2621-B-001 -003 -MY3). D.R.R. was supported by the US National  
396 Science Foundation (IOS-1257530 and IOS-1656098).

397

398

399 **Reference:**

- 400 1 Bolnick, D. I. *et al.* Ecological release from interspecific competition leads  
401 to decoupled changes in population and individual niche width. *Proc. R.*  
402 *Soc. Lond., Ser. B: Biol. Sci.* **277**, 1789-1797 (2010).
- 403 2 Pianka, E. R. Niche overlap and diffuse competition. *Proc. Natl. Acad. Sci.*  
404 *USA* **71**, 2141-2145 (1974).
- 405 3 Hardin, G. The competitive exclusion principle. *Science* **131**, 1292-1297  
406 (1960).
- 407 4 Celiker, H. & Gore, J. Competition between species can stabilize public-  
408 goods cooperation within a species. *Mol. Syst. Biol.* **8** (2012).
- 409 5 Korb, J. & Foster, K. R. Ecological competition favours cooperation in  
410 termite societies. *Ecol. Lett.* **13**, 754-760 (2010).
- 411 6 Mitri, S., Xavier, J. B. & Foster, K. R. Social evolution in multispecies  
412 biofilms. *Proc. Natl. Acad. Sci. USA* **108**, 10839-10846 (2011).
- 413 7 Liu, M. *et al.* Ecological transitions in grouping benefits explain the  
414 paradox of environmental quality and sociality. (in review).
- 415 8 Sun, S.-J. *et al.* Climate-mediated cooperation promotes niche expansion in  
416 burying beetles. *eLife* **3**, e02440 (2014).
- 417 9 Pukowski, E. Ökologische Untersuchungen an *Necrophorus* F. *Zeitschrift*  
418 *fur Morphologie und Ökologie der Tiere* **27**, 518 – 586 (1933).
- 419 10 Scott, M. P. The ecology and behavior of burying beetles. *Annu. Rev.*  
420 *Entomol.* **43**, 595-618 (1998).

- 421 11 Rozen, D., Engelmoer, D. & Smiseth, P. Antimicrobial strategies in burying  
422 beetles breeding on carrion. *Proc. Natl. Acad. Sci. USA* **105**, 17890-17895  
423 (2008).
- 424 12 Cotter, S. C. & Kilner, R. M. Sexual division of antibacterial resource defence  
425 in breeding burying beetles, *Nicrophorus vespilloides*. *J. Anim. Ecol.* **79**, 35-  
426 43 (2010).
- 427 13 Kalinova, B., Podskalska, H., Růžička, J. & Hoskovec, M. Irresistible bouquet  
428 of death—how are burying beetles (Coleoptera: Silphidae: Nicrophorus)  
429 attracted by carcasses. *Naturwissenschaften* **96**, 889-899 (2009).
- 430 14 Podskalská, H., Růžička, J., Hoskovec, M. & Šálek, M. Use of infochemicals  
431 to attract carrion beetles into pitfall traps. *Entomol. Exp. Appl.* **132**, 59-64  
432 (2009).
- 433 15 Dicke, M. & Sabelis, M. W. Infochemical terminology: based on cost-benefit  
434 analysis rather than origin of compounds? *Funct. Ecol.* **2**, 131-139 (1988).
- 435 16 De Jaegher, K. & Hoyer, B. By-product mutualism and the ambiguous  
436 effects of harsher environments – A game-theoretic model. *J. Theor. Biol.*  
437 **393**, 82-97, doi:<https://doi.org/10.1016/j.jtbi.2015.12.034> (2016).
- 438 17 Feeney, W. E. *et al.* Brood Parasitism and the Evolution of Cooperative  
439 Breeding in Birds. *Science* **342**, 1506-1508, doi:10.1126/science.1240039  
440 (2013).
- 441 18 Gross, M. R. Alternative reproductive strategies and tactics: diversity  
442 within sexes. *Trends in Ecology & Evolution* **11**, 92-98,  
443 doi:[http://dx.doi.org/10.1016/0169-5347\(96\)81050-0](http://dx.doi.org/10.1016/0169-5347(96)81050-0) (1996).
- 444 19 Tomkins, J. L. & Hazel, W. The status of the conditional evolutionarily  
445 stable strategy. *Trends Ecol. Evol.* **22**, 522-528 (2007).
- 446 20 Keller, L. & Nonacs, P. The role of queen pheromones in social insects:  
447 queen control or queen signal? *Anim. Behav.* **45**, 787-794 (1993).
- 448 21 Vander Meer, R. K., Breed, M. D., Winston, M. & Espelie, K. *Pheromone*  
449 *Communication in Social Insects*. (Westview Press, 1998).
- 450 22 Tribble, W. *et al.* Orco mutagenesis causes loss of antennal lobe glomeruli  
451 and impaired social behavior in ants. *Cell* **170**, 727-735. e710 (2017).
- 452 23 Yan, H. *et al.* An Engineered orco Mutation Produces Aberrant Social  
453 Behavior and Defective Neural Development in Ants. *Cell* **170**, 736-  
454 747.e739, doi:<https://doi.org/10.1016/j.cell.2017.06.051> (2017).
- 455 24 Hofmann, H. A. *et al.* An evolutionary framework for studying mechanisms

456 of social behavior. *Trends Ecol. Evol.* **29**, 581-589,  
457 doi:<http://dx.doi.org/10.1016/j.tree.2014.07.008> (2014).  
458 25 Vas, G. & Vékey, K. Solid-phase microextraction: a powerful sample  
459 preparation tool prior to mass spectrometric analysis. *J. Mass Spectrom.*  
460 **39**, 233-254, doi:doi:10.1002/jms.606 (2004).  
461

462

463

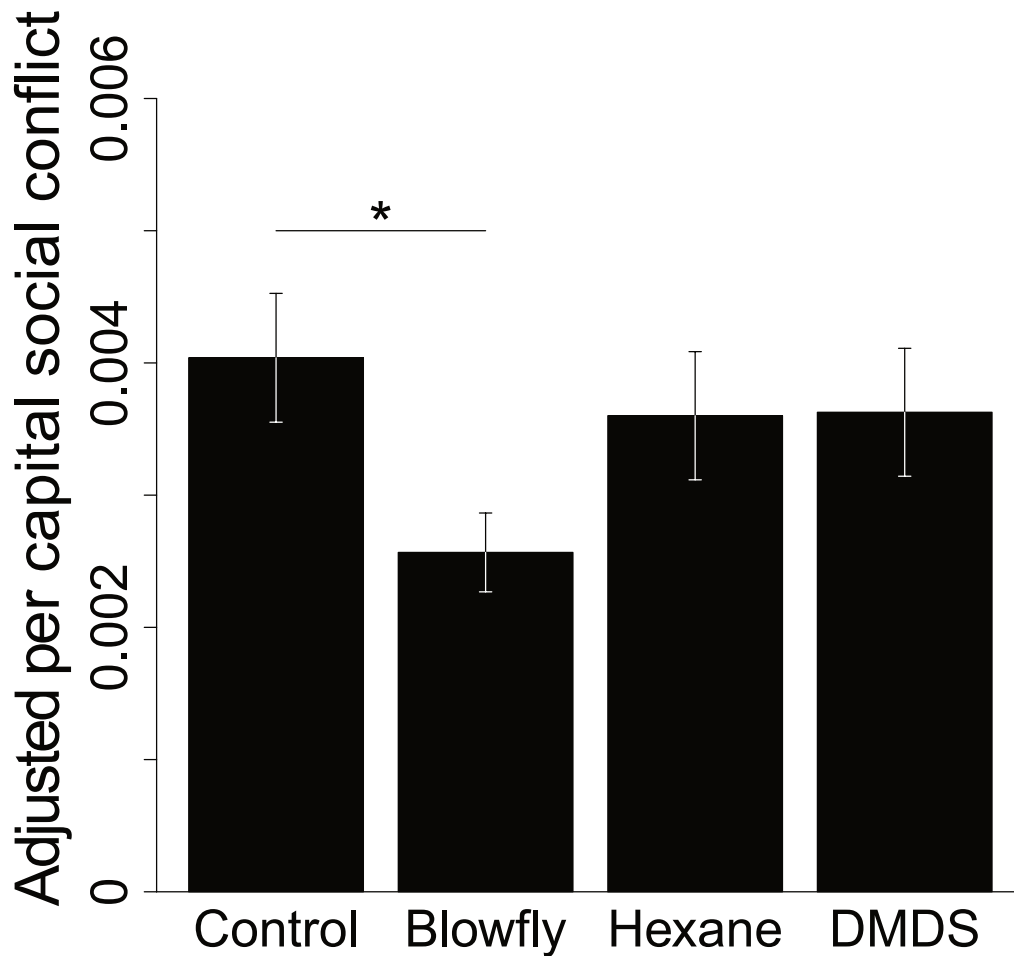

464

465 **Figure S1 | Adjusted per capita social conflict in different experimental**  
466 **treatments.** Adjusted per capita social conflict (i.e. per capita social conflict  
467 divided by the total cooperative investment time) was lower in the blowfly than  
468 control treatments. There was no difference in adjusted per capita social conflict  
469 between the DMDS and hexane control treatments. \*  $P < 0.05$ .
